# Supplementary material
Source: publisher figshare collection journal article supplement (https://acs.figshare.com/ndownloader/files/21602259)
Supplement: Supplementary file 1 [file 21602259]

## ***Synthesis, characterization, and utilization of a lignin-based adsorbent for effective removal of azo dye from aqueous solution***

Xianzhi Meng<sup>†,\*</sup>, Brent Scheidemantle<sup>‡,§</sup>, Mi Li<sup>†</sup>, Yunyan Wang<sup>†</sup>, Xianhui Zhao<sup>⊥</sup>, Miguel Toro-González<sup>#</sup>, Priyanka Singh<sup>‡,§</sup>, Yunqiao Pu<sup>//</sup>, Charles E. Wyman<sup>‡,§</sup>, Soydan Ozcan<sup>∇,Ω</sup>, Charles M. Cai<sup>‡,§</sup>, Arthur J. Ragauskas<sup>†, //, Φ\*</sup>

<sup>†</sup> Department of Chemical & Biomolecular Engineering, University of Tennessee Knoxville, Knoxville, TN 37996, USA

<sup>‡</sup> Center of Environmental and Research Technology (CE-CERT), University of California, Riverside, CA 92507, USA

<sup>§</sup> Department of Chemical and Environmental Engineering, Bourns College of Engineering, University of California, Riverside, CA 92521, USA

<sup>⊥</sup> Chemical Sciences Division, Oak Ridge National Laboratory, Oak Ridge, TN 37831, USA

<sup>#</sup> Isotope and Fuel Cycle Technology Division, Oak Ridge National Laboratory, Oak Ridge, TN 37831, USA

<sup>//</sup> Biosciences Division, Oak Ridge National Laboratory, Oak Ridge, TN 37831, USA

<sup>∇</sup> Department of Mechanical, Aerospace, Biomedical Engineering, University of Tennessee, Knoxville, TN 37996, USA

<sup>Ω</sup> Manufacturing Demonstration Facility, Energy and Transportation Science Division, Oak Ridge National Laboratory, Knoxville, TN 37932 USA

<sup>Φ</sup> Department of Forestry, Wildlife, and Fisheries; Center for Renewable Carbon, The University of Tennessee Knoxville, Institute of Agriculture, Knoxville, TN 37996, USA

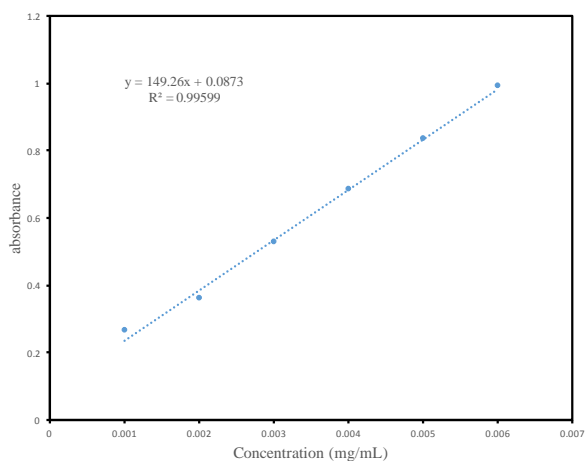

**Figure S1.** A calibration curve of absorbance against concentration of methylene blue according the Beer's law.

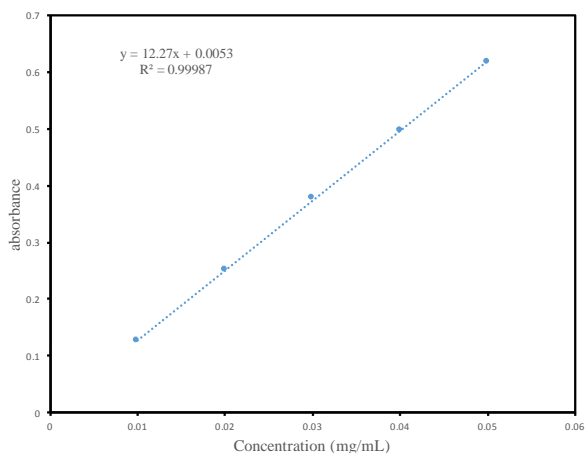

**Figure S2.** A calibration curve of absorbance against concentration of direct blue 1 according the Beer's law.

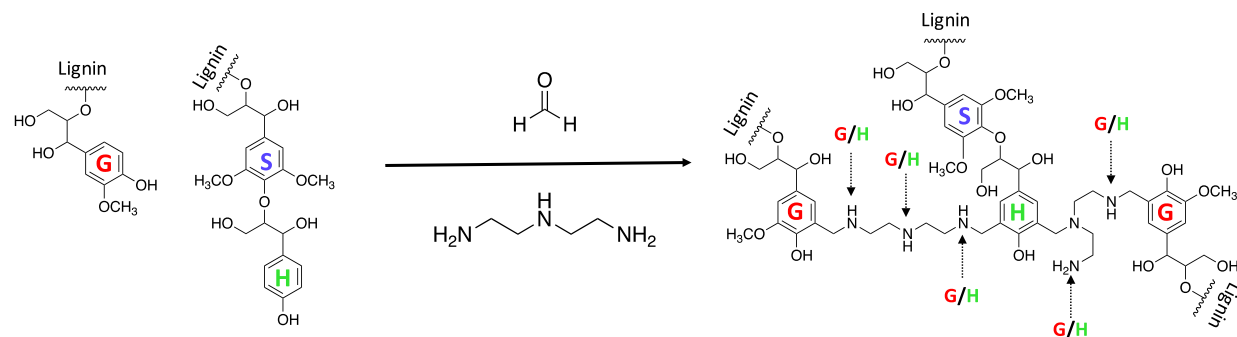

**Figure S3.** A schematic diagram of Mannich reaction and the structure transformation of CELF lignin during the amination reaction.

### Ninhydrin test

Primary and secondary amines were visually test by Ninhydrin. ~10 mg of Ninhydrin (1,2,3-Indantrione monohydrate) was dissolved in 2 mL of dimethyl sulfoxide in a test tube. Around 2 mg of the lignin sample as added into the test tube. The solution was heated and boiled for about 5 min, and the color of the solution was observed and recorded.

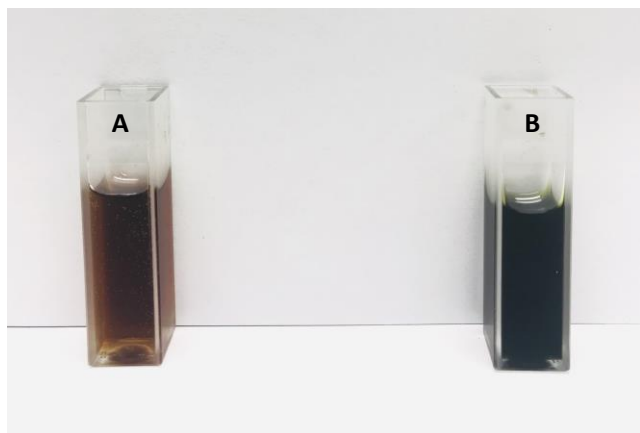

**Figure S4.** Ninhydrin test of CELF lignin (A) and the aminated lignin (B).

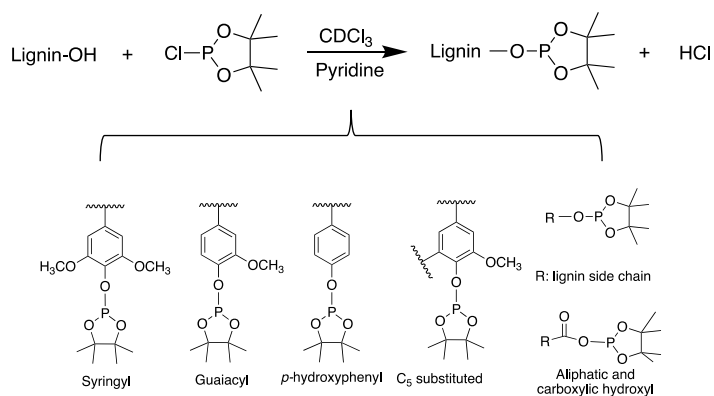

**Figure S5.** Phosphitylation of various OHs in lignin structural units with TMDP.

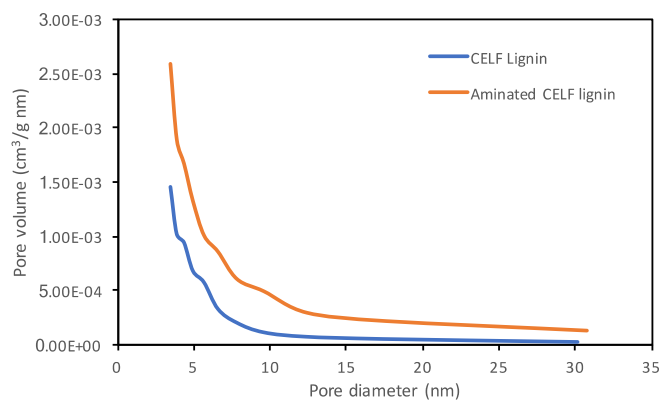

**Figure S6.** Pore size distribution of lignin samples before and after amination.

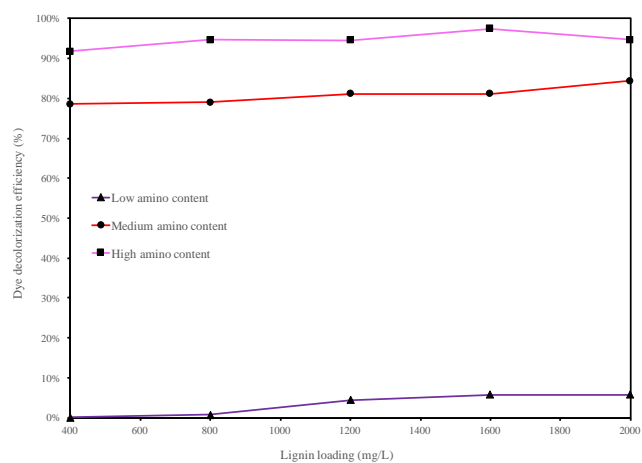

**Figure S7.** The effect of amino content on the adsorptivity of aminated CELF lignin.

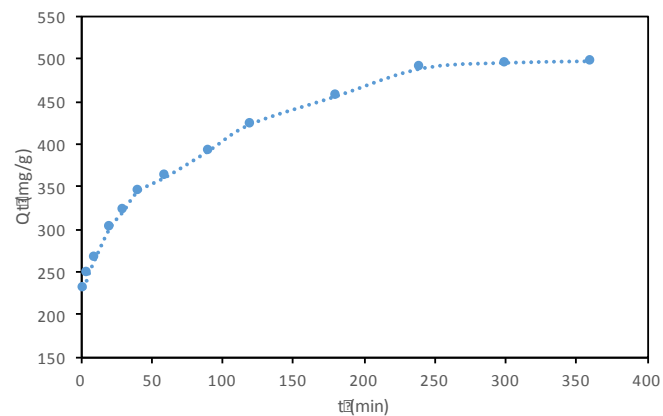

**Figure S8.** Effect of contact time on adsorption of DB 1 dye by aminated CELF lignin.

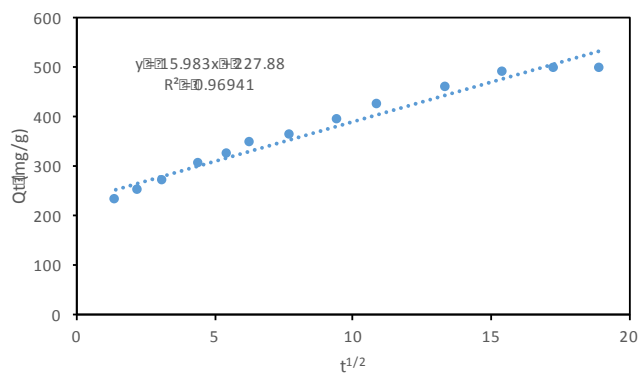

**Figure S9.** Intraparticle diffusion kinetic of DB 1 dye.

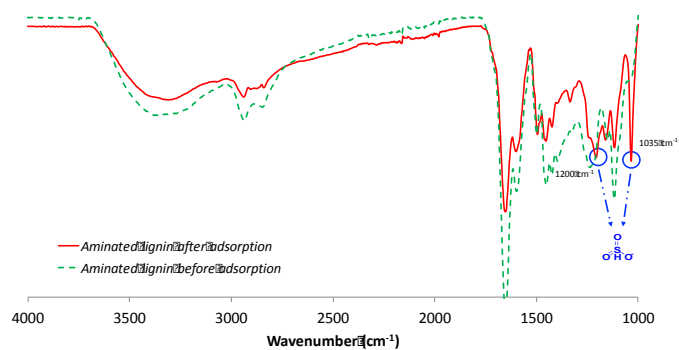

**Figure S10.** FTIR spectra of the aminated CELF lignin before and after adsorption of DB 1 dye.
